# Supplementary material for: Reconstitution properties of biologically active polymersomes after cryogenic freezing and a freeze-drying process
Source: Royal Society of Chemistry journal article supplement (doi:10.1039/c8ra03964j), 2018-01-01
Supplement: c8ra03964j1.pdf [file c8ra03964j1.pdf]

## Electronic Supplementary Information

### **Reconstitution properties of biologically active polymersomes after cryogenic freezing and freeze-drying process**

Robert Ccorahua<sup>§a</sup>, Silvia Moreno<sup>§b</sup>, Hannes Gumz<sup>bc</sup>, Karin Sahre<sup>b</sup>, Brigitte Voit<sup>\*bc</sup>,  
Dietmar Appelhans<sup>\*b</sup>

<sup>a</sup> Department of Mechanical Engineering Pontificia Universidad Católica del Peru,  
Lima 32, Peru

<sup>b</sup> Leibniz-Institut für Polymerforschung Dresden e.V., Hohe Straße 6, 01069  
Dresden, Germany E-Mail: applhans@ipfdd.de; voit@ipfdd.de

<sup>c</sup> Organic Chemistry of Polymers, Technische Universität Dresden, 01062 Dresden,  
Germany and Center for Advancing Electronics Dresden, 01062 Dresden, Germany

<sup>§</sup> Equal contribution of both authors

\*Corresponding author: applhans@ipfdd.de, voit@ipfdd.de

# Content of ESI

|                                                                                                                                                                                                                                                                                                                                                                               | Page |
|-------------------------------------------------------------------------------------------------------------------------------------------------------------------------------------------------------------------------------------------------------------------------------------------------------------------------------------------------------------------------------|------|
| <b>Experimental</b>                                                                                                                                                                                                                                                                                                                                                           | 3    |
| <b>Additional figures and tables</b>                                                                                                                                                                                                                                                                                                                                          | 3    |
| Fig. ESI- 1    Reaction scheme for the preparation of: A) PEG-Br macroinitiator, B) pre-crosslinker and the crosslinker DMIBMA and C) poly(ethyleneglycol) <sub>45</sub> - <i>block</i> -poly(diethylaminoethyl-methacrylate- <i>stat</i> -3,4-dimethylmaleinimidobutylmethacrylate) <sub>99</sub> (PEG <sub>45</sub> - <i>b</i> - P(DEAMA- <i>s</i> -DMIBM) <sub>92</sub> ). | 3    |
| Fig. ESI- 2:    Swelling-shrinking cycles of pH-responsive polymersomes between pH 5 and pH 8 Psome <i>fresh</i> and Psome <i>frozen</i> storage for different times.                                                                                                                                                                                                         | 4    |
| Fig. ESI-3:    Diameter of the reconstituted non-crosslinked Psomes studied by DLS using SM-1 (stored at -20°C for 8 days) and SM-2 (stored at 4°C for 8 days) as storage methods.                                                                                                                                                                                            | 4    |
| Tab.ESI-1    Specifications of Block copolymers synthesized by ATRP.                                                                                                                                                                                                                                                                                                          | 5    |
| Tab.ESI-2    Diameter distribution of polymersomes (PS) modified with HSA, investigated as (i) freshly prepared sample, (ii) frozen sample at -20°C for 1 day followed upon gentle thawing to room temperature, and (ii) after freeze-drying and direct redispersion in slightly acidic solution. *The DLS measurements correspond to PS at pH 5.                             | 5    |
| <b>References</b>                                                                                                                                                                                                                                                                                                                                                             | 5    |

## Experimental

### Synthesis of the compounds in order to get the block-copolymer

The first step was to synthesize the required block copolymer (**Figure 1-SI**) having methoxy (**BCP1**) end groups at their hydrophilic poly(ethylene glycol) (PEG) segment by using our previous published approach<sup>1,2</sup> through atom transfer radical polymerization (ATRP) and identical use of monomer ratio<sup>3</sup> for the fabrication of **BCP1**. The hydrophobic part of the block copolymers consists of pH-sensitive 2-(diethylamino)ethyl methacrylate (DEAEM) and photo-crosslinker, 3,4-dimethyl maleic imidoethyl methacrylate (DMIBMA).<sup>4,5</sup> The composition of **BCP1** was determined by <sup>1</sup>H-NMR and SEC-MALLS. The composition and the number average molecular weight ( $M_n$ ) of the block copolymer **BCP1** were determined with <sup>1</sup>H NMR spectroscopy from the peak integrals of PEG (3.65 ppm), DEAEMA (2.65-2.78 ppm) and DMIBMA (3.52 ppm) by taking the PEG block as an internal standard. Additionally, the molar mass distributions ( $\mathcal{D}$ ) were determined by SEC as described in previous section. **Table S1** shows the corresponding results.

### Additional figures and tables

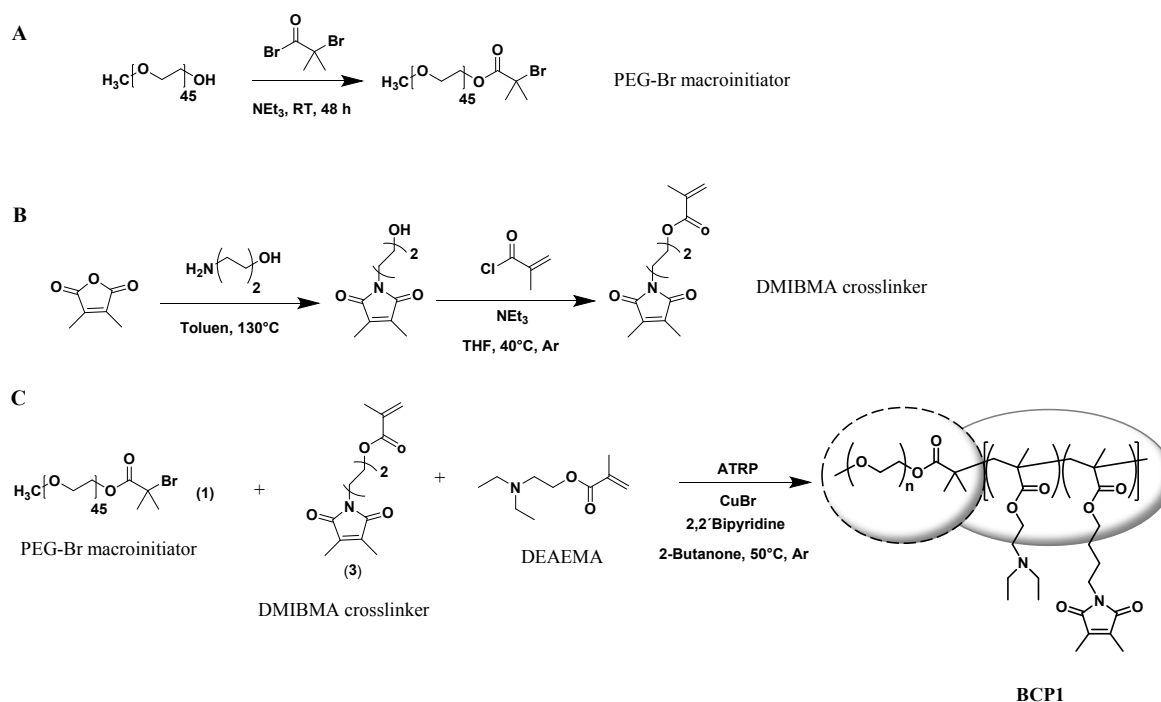

**Figure ESI-1** Reaction scheme for the preparation of: A) PEG-Br macroinitiator, B) pre-crosslinker and the crosslinker DMIBMA and C) poly(ethyleneglycol)<sub>45</sub>-*block*-poly(diethylaminoethyl-methacrylate-*stat*-3,4-dimethylmaleinimidobutylmethacrylate)<sub>99</sub> (PEG<sub>45</sub>-*b*-P(DEAMA-*s*-DMIBM)<sub>92</sub>; BCP1).

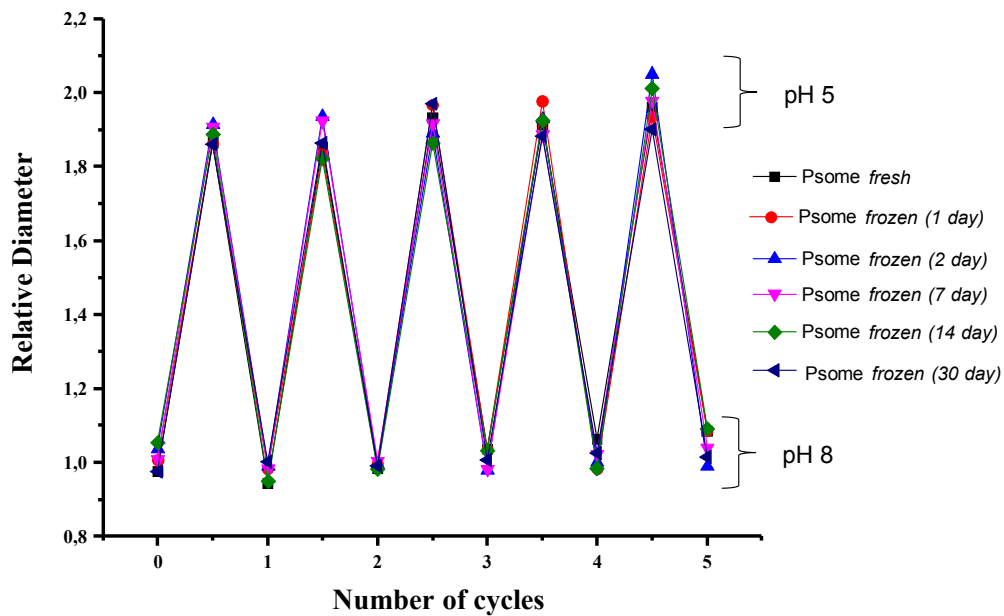

**Figure ESI-2** Swelling-shrinking cycles of pH-responsive polymersomes between pH 5 and pH 8 *Psome fresh* and *Psome frozen* storage for different times.

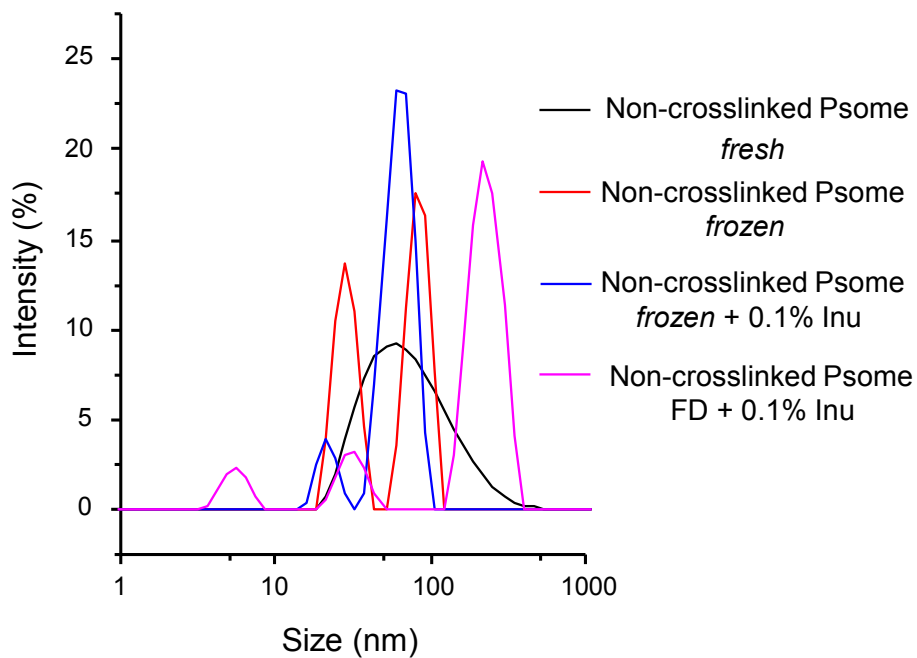

**Figure ESI-3** Diameter of the reconstituted non-crosslinked Psores studied by DLS using SM-1 (stored at  $-20^{\circ}\text{C}$  for 8 days) and SM-2 (stored at  $4^{\circ}\text{C}$  for 8 days after freeze-drying process) as storage methods.

**Table ESI-1** Specifications of Block copolymers synthesized by ATRP

| Code | Polymer Chemical Composition                                        | M <sub>w</sub> (g/mol) <sup>a</sup> | M <sub>n</sub> (g/mol) <sup>a</sup> | Đ (Mw/Mn) <sup>a</sup> | M <sub>n</sub> estimated by NMR <sup>b</sup> |
|------|---------------------------------------------------------------------|-------------------------------------|-------------------------------------|------------------------|----------------------------------------------|
| BCP1 | PEG <sub>45</sub> -b-(DEAEMA <sub>73</sub> -S-DMIBM <sub>19</sub> ) | 29300                               | 23850                               | 1.22                   | 20800                                        |

<sup>a</sup>Molar mass distribution is determined by SEC. <sup>b</sup> Molecular weight is calculated by <sup>1</sup>H NMR.

**Table ESI-2** Diameter distribution of polymersomes (Psome) modified with HSA, investigated as (i) freshly prepared sample, (ii) frozen sample at -20°C for 1 day followed upon gentle thawing to room temperature, and (ii) after freeze-drying and direct redispersion in slightly acidic solution.

\*The DLS measurements correspond to Psome at pH 5.

| Modified Psome*         | Diameter (nm) | PDI   |
|-------------------------|---------------|-------|
| Psome-HSA <i>fresh</i>  | 128           | 0.224 |
| Psome-HSA <i>frozen</i> | 126           | 0.256 |
| Psome-HSA-FD            | 116           | 0.181 |

## References

- (1) Gaitzsch, J.; Appelhans, D.; Wang, L.; Battaglia, G.; Voit, B. *Angew. Chem. Int. Ed*, 2012, **51**, 4448.
- (2) Gräfe, D.; Gaitzsch, J.; Appelhans, D.; Voit, B. *Nanoscale*, 2014, **6**, 10752.
- (3) Matyjaszewski, K. *Macromolecules*, 2012, **45**, 4015.
- (4) Save, M.; Weaver, J. V. M.; Armes, S. P.; McKenna, P. *Macromolecules*, 2002, **35**, 1152.
- (5) Vo, C. D.; Kuckling, D.; Adler, H. J. P.; Schönhoff, M. *Colloid. Polymer. Sci*, 2002, **280**, 400.
